# Supplementary material
Source: publisher figshare collection journal article supplement (https://gsajournals.figshare.com/ndownloader/files/22651040)
Supplement: Supplementary file 1 [file 22651040]

## Sheet: Gene Ontology
GO term	Description	P-value	FDR q-value
GO:0044237	cellular metabolic process	4.57e-07	0.00712
GO:0006807	nitrogen compound metabolic process	1.39e-06	0.0108
GO:0008152	metabolic process	1.62e-06	0.00842
GO:0034641	cellular nitrogen compound metabolic process	4.36e-06	0.017
GO:0071704	organic substance metabolic process	6.94e-06	0.0216
GO:0006725	cellular aromatic compound metabolic process	1.02e-05	0.0264
GO:0044238	primary metabolic process	1.02e-05	0.0227
GO:0006139	nucleobase-containing compound metabolic process	1.11e-05	0.0215
GO:1901360	organic cyclic compound metabolic process	1.47e-05	0.0255
GO:0032508	DNA duplex unwinding	1.58e-05	0.0245
GO:0043170	macromolecule metabolic process	3.73e-05	0.0528
GO:0046483	heterocycle metabolic process	3.77e-05	0.0489
GO:2000144	positive regulation of DNA-templated transcription, initiation	5.13e-05	0.0614
GO:0032392	DNA geometric change	5.17e-05	0.0574
GO:0006284	base-excision repair	6.97e-05	0.0723
GO:0046907	intracellular transport	7.45e-05	0.0725
GO:0044260	cellular macromolecule metabolic process	7.91e-05	0.0724
GO:0006554	lysine catabolic process	0.000103	0.0894
GO:0090304	nucleic acid metabolic process	0.000108	0.0884
GO:2000142	regulation of DNA-templated transcription, initiation	0.000143	0.111
GO:0006553	lysine metabolic process	0.00018	0.133
GO:0043488	regulation of mRNA stability	0.000204	0.144
GO:0046598	positive regulation of viral entry into host cell	0.000219	0.148
GO:1903902	positive regulation of viral life cycle	0.00022	0.143
GO:0060261	positive regulation of transcription initiation from RNA polymerase II promoter	0.000226	0.141
GO:0009068	aspartate family amino acid catabolic process	0.000226	0.135
GO:1903900	regulation of viral life cycle	0.000312	0.18
GO:0009066	aspartate family amino acid metabolic process	0.000339	0.188
GO:0009894	regulation of catabolic process	0.000348	0.187
GO:0006996	organelle organization	0.000384	0.199
GO:0043487	regulation of RNA stability	0.000466	0.234
GO:0048524	positive regulation of viral process	0.000476	0.231
GO:0032446	protein modification by small protein conjugation	0.000478	0.226
GO:0043901	negative regulation of multi-organism process	0.000598	0.274
GO:0006886	intracellular protein transport	0.000655	0.291
GO:0031323	regulation of cellular metabolic process	0.000662	0.286
GO:0045628	regulation of T-helper 2 cell differentiation	0.000707	0.297
GO:0016070	RNA metabolic process	0.000707	0.29
GO:0070647	protein modification by small protein conjugation or removal	0.000713	0.284
GO:0050792	regulation of viral process	0.000798	0.31
GO:0016071	mRNA metabolic process	0.000822	0.312
GO:0043900	regulation of multi-organism process	0.000951	0.352

## Sheet: Gene List
1538 elements included exclusively in "sens -1 20m":
LOC643837
NOL9
ZBTB48
THAP3
PARK7
CLSTN1
PLOD1
RSG1
USP48
KDM1A
ZNF436
PITHD1
LYPLA2
MTFR1L
PIGV
ZDHHC18
NUDC
TMEM222
PPP1R8
SCARNA1
RPA2
ATPIF1
ADC
ZMYM6NB
PPIE
ZMPSTE24
EXO5
MIR30C1
HIVEP3
PTPRF
TCTEX1D4
IPP
MKNK1
FAF1
RNF11
BTF3L4
ORC1
SLC1A7
LRP8
LRRC42
C8A
TACSTD2
TM2D1
WDR78
TYW3
ZZZ3
USP33
WDR63
GBP2
GFI1
DNTTIP2
ALG14
VCAM1
EXTL2
S1PR1
PRPF38B
AMIGO1
GSTM1
RBM15
OVGP1
ADORA3
RAP1A
MOV10
PTPN22
HIPK1
CSDE1
MAB21L3
FAM46C
RBM8A
RNF115
SV2A
MTMR11
APH1A
LYSMD1
TMOD4
PSMB4
KPRP
SMCP
SPRR4
CHTOP
TPM3
HAX1
MTX1
CCT3
ISG20L2
FCRL4
FCRL2
CD1C
B4GALT3
NDUFS2
C1orf192
HSPA6
DDR2
TMCO1
DCAF6
TIPRL
VAMP4
PIGC
TNFSF4
ACBD6
TEDDM1
DHX9
TSEN15
IVNS1ABP
FAM5C
MIR181B1
NR5A2
LINC00862
RABIF
KLHL12
TMEM183A
LAX1
DYRK3
CD55
CR1
TRAF5
VASH2
KCTD3
TGFB2
BPNT1
FBXO28
DEGS1
EPHX1
TRIM11
AGT
EGLN1
NTPCR
EXO1
AKT3
ZNF669
GCSAML
OR2T35
SH3BP5L
PGBD2
IDI2-AS1
IL2RA
USP6NL
ECHDC3
UPF2
DHTKD1
PRPF18
ACBD7
KIAA1217
ZEB1
KIF5B
ZNF32-AS3
ZNF22
FAM170B
ERCC6
MSMB
SGMS1
ANK3
MYPN
STOX1
DDX21
HK1
TYSND1
SGPL1
MRPS16
AP3M1
TMEM254-AS1
STAMBPL1
IFIT1
ANKRD1
TNKS2
ZFYVE27
C10orf2
LBX1
NOLC1
LOC100505761
NT5C2
USMG5
PDCD4
GPAM
PLEKHS1
C10orf118
CACUL1
EIF3A
PRDX3
METTL10
DHX32
NPS
MTG1
IRF7
KRTAP5-6
SNORA54
TRIM21
TRIM68
HBG1
TRIM5
SMPD1
APBB1
OR6A2
OR10A5
LMO1
TMEM9B
LOC440028
SBF2-AS1
EIF4G2
ZBED5-AS1
PSMA1
SPTY2D1
PRMT3
GAS2
LIN7C
EIF3M
NAT10
PDHX
TTC17
MADD
SPI1
NDUFS3
SSRP1
FAM111A
MRPL16
GIF
MS4A2
DDB1
TMEM258
SCGB2A1
B3GAT3
METTL12
TMEM179B
SNORD28
RARRES3
STIP1
DNAJC4
SF1
BATF2
FAU
SYVN1
SIPA1
RELA
CFL1
FIBP
FOSL1
C11orf24
PPP6R3
RNF121
LAMTOR1
STARD10
RELT
FAM168A
MRPL48
PGM2L1
PRCP
MED17
CEP57
CCDC82
DCUN1D5
DYNC2H1
SLN
ACAT1
EXPH5
IL18
C11orf71
REXO2
PAFAH1B2
UBE4A
CXCR5
DPAGT1
RNF26
TMEM136
TBCEL
MIRLET7A2
TBRG1
SNX19
VPS26B
CCND2
GAPDH
AICDA
MFAP5
A2ML1
CLECL1
TAS2R7
TAS2R42
PRB1
ARHGDIB
DERA
CAPZA3
SLCO1A2
IAPP
PPFIBP1
ERGIC2
IPO8
DDX11-AS1
LINC00938
SLC38A1
SLC48A1
ARF3
WNT10B
LMBR1L
TUBA1B
TMBIM6
CSRNP2
SMAGP
SLC4A8
KRT6B
KRT77
EIF4B
MFSD5
MAP3K12
TARBP2
MIR196A2
NEUROD4
DGKA
PMEL
NACA
FLJ41278
RAP1B
NUP107
SLC35E3
FRS2
KCNMB4
BBS10
LIN7A
DUSP6
CRADD
CCDC41-AS1
TMCC3
NDUFA12
TMPO
UHRF1BP1L
PAH
TDG
EID3
MTERFD3
TCHP
GIT2
OAS3
SDSL
SUDS3
RNF10
ACADS
PSMD9
TCTN2
SCARB1
BRI3BP
GPR133
MIPEPP3
NUPL1
UBL3
KATNAL1
N4BP2L1
PROSER1
WBP4
ENOX1
NUFIP1
GTF2F2
SLC25A30
SIAH3
CPB2
ESD
SUCLA2
EBPL
HNRNPA1L2
KDELC1
METTL21EP
ARGLU1
HNRNPC
RPGRIP1
SNORD8
HAUS4
ACIN1
DHRS4
RABGGTA
SCFD1
SNX6
LOC100288846
KLHDC1
ARF6
ATP5S
ATG14
OTX2-AS1
NAA30
PCNXL4
SIX4
ESR2
FUT8
GPHN
ATP6V1D
ARG2
SRSF5
PTGR2
COQ6
AHSA1
ALKBH1
ADCK1
TDP1
C14orf159
FAM181A-AS1
DDX24
PAPOLA
SNORD114-30
DYNC1H1
MTA1
C14orf80
TUBGCP5
PAR5
KATNBL1
ZNF770
LOC145845
FSIP1
INO80
NDUFAF1
RTF1
SNAP23
LCMT2
SLC28A2
SPATA5L1
AP4E1
FAM63B
MYO1E
GTF2A2
NARG2
VPS13C
TLN2
SNX22
CSNK1G1
OAZ2
DPP8
PTPLAD1
RPLP1
STOML1
FBXO22-AS1
SCARNA15
FAM103A1
ISG20
ZNF710
NGRN
ZNF774
MAN2A2
FAM169B
NPRL3
NHLRC4
NME3
NOXO1
SNORD60
TNFRSF12A
MGRN1
ROGDI
CLEC16A
RRN3
SMG1
GDE1
C16orf62
CRYM
METTL9
PLK1
CLN3
APOBR
ATXN2L
RABEP2
PPP4C
CD2BP2
SETD1A
STX4
KAT8
CLUHP3
ZNF267
LONP2
CHD9
IRX3
BBS2
HERPUD1
ARL2BP
SETD6
EDC4
DDX19B
ZNF23
PSMD7
GABARAPL2
KARS
CMC2
FOXL1
TIMM22
SNORD91A
PAFAH1B1
SHPK
MED11
NEURL4
SENP3-EIF4A1
CD68
ATP1B2
PFAS
TRPV2
NT5M
DRG2
AKAP10
LGALS9
SLC46A1
UNC119
ALDOC
ERAL1
DHRS13
TEFM
ADAP2
AA06
CCT6B
RDM1
CCL23
ZNHIT3
DUSP14
HNF1B
IKZF3
NR1D1
WIPF2
RARA
KRT10
KRT39
KRT31
RND2
ARL4D
MPP2
HDAC5
ATXN7L3
FZD2
DBF4B
KPNB1
MRPL10
SCRN2
HOXB5
KAT7
DLX4
MBTD1
DGKE
RNF126P1
MRPS23
MKS1
LPO
C17orf47
CLTC
RNFT1
NACA2
DDX5
AXIN2
PSMD12
AMZ2
ABCA6
MAP2K6
NT5C
KIAA0195
FOXJ1
ST6GALNAC1
EIF4A3
LINC00482
P4HB
C18orf56
GNAL
ESCO1
NPC1
DSG1
DSG4
KLHL14
KATNAL2
CCDC11
ELAC1
TXNL1
ZNF532
SERPINB2
LOC284294
MIER2
PCSK4
ALKBH7
TNFSF9
SH2D3A
MCOLN1
XAB2
SNAPC2
OR7E24
PPAN-P2RY11
ICAM4
FDX1L
CDC37
ILF3-AS1
ZNF440
ZNF20
ZNF563
ZNF709
TNPO2
GCDH
RAD23A
LOC284454
ZNF333
AP1M1
ANO8
UPF1
SUGP2
MAU2
ZNF738
ZNF91
RPSAP58
LINC00662
PDCD2L
COX6B1
U2AF1L4
SDHAF1
ZNF571
ZFP30
GGN
FBXO27
PSMC4
SERTAD1
CEACAM21
CD79A
LIPE
CXCL17
ETHE1
ZNF575
XRCC1
KCNN4
ZNF283
ZNF45
ZNF221
ZNF234
ZNF227
ZNF235
CLPTM1
ZNF296
VASP
GIPR
SNRPD2
PPP5C
GLTSCR1
LIG1
PNKP
TBC1D17
NAPSA
KLK11
SIGLEC5
FPR2
LILRB4
KIR3DL3
ZNF524
ZNF460
ZNF543
ZNF548
ZNF772
ZNF530
ZSCAN4
TRAPPC12
RPS7
LOC150622
RAD51AP2
GEN1
GDF7
UBXN2A
PTRHD1
TMEM214
AGBL5
PREB
MPV17
GTF3C2
PPM1G
SNORD53
LCLAT1
LINC00486
HEATR5B
ATL2
DHX57
PPP1R21
FSHR
COMMD1
PCBP1
CYP26B1
EMX1
SEMA4F
REG1B
SUCLG1
RNF181
GNLY
FAHD2A
ARID5A
KANSL3
TMEM131
RNF149
IL1R2
IL1RL1
MRPS9
SULT1C2
CCDC138
BUB1
CHCHD5
PSD4
TMEM177
PTPN4
UGGT1
UBXN4
MCM6
SPOPL
ACVR2A
NMI
ARL5A
ARL6IP6
NR4A2
PKP4
ITGB6
TBR1
DPP4
IFIH1
GCA
TTC21B
PPIG
SSB
METTL5
MYO3B
CYBRD1
TTC30B
FKBP7
SSFA2
DNAJC10
ZC3H15
DNAH7
MARS2
CDK15
SUMO1
CCNYL1
MREG
SMARCAL1
TMBIM1
SLC11A1
BCS1L
RNF25
ZFAND2B
TUBA4A
RHBDD1
SNORD20
KCNJ13
CAPN10
SDCBP2-AS1
IDH3B
MRPS26
SPEF1
ISM1-AS1
NAA20
PLK1S1
NXT1
PYGB
GINS1
NANP
HM13
ID1
PXMP4
RALY
MYH7B
GDF5
PHF20
RBL1
SNORA71B
PPP1R16B
IFT52
YWHAB
PLTP
NCOA3
BCAS4
MOCS3
CSTF1
CASS4
FAM209B
PPP1R3D
DNAJC5
LIPI
MIR155HG
MIS18A
IFNAR2
DNAJC28
FAM207A
MCM3AP
BCL2L13
MICAL3
GNB1L
KLHL22
THAP7
RTDR1
RAB36
CRYBB2P1
ZMAT5
UQCR10
DUSP18
APOL6
GGA1
TOMM22
SNORD43
SGSM3
ST13
C22orf46
RRP7A
TTLL1
PARVG
UPK3A
C22orf26
ODF3B
MAPK8IP2
RAD18
OGG1
TAMM41
CHCHD4
C3orf20
ZFYVE20
KAT2B
TGFBR2
CMTM7
DYNC1LI1
ACAA1
MYD88
WDR48
MOBP
ULK4
TRAK1
LYZL4
VIPR1
SEC22C
ANO10
LOC100132146
CAMP
PRKAR2A
ARIH2
IMPDH2
QRICH1
CCDC71
C3orf62
MST1
FAM212A
UBA7
RBM6
TUSC2
NPRL2
WDR82
NEK4
ERC2-IT1
ABHD6
FHIT
PSMD6-AS2
TMF1
ARL6IP5
MITF
PROS1
DCBLD2
TBC1D23
NIT2
CEP97
ALCAM
CBLB
DZIP3
RETNLB
GUCA1C
CD96
CD200R1
C3orf17
SIDT1
DRD3
TIMMDC1
PLA1A
POLQ
ILDR1
RUVBL1
ACAD9
COPG1
PIK3R4
SNORA58
SLC35G2
COPB2
ATP1B3
XRN1
CPA3
HPS3
WWTR1-AS1
ANKUB1
FAM194A
MBNL1
DHX36
LINC00880
LXN
KPNA4
LOC646168
GOLIM4
TERC
FNDC3B
DNAJC19
KLHL6
EHHADH-AS1
TMEM41A
EIF4A2
BCL6
LRRC15
PCYT1A
SENP5
DLG1
LRCH3
CRIPAK
RAB28
NCAPG
DHX15
FAM114A1
TMEM156
RFC1
RPL9
LIAS
TMEM33
GUF1
SCFD2
SRD5A3-AS1
NOA1
CENPC1
FDCSP
AFM
CXCL11
NUP54
CXCL13
MRPL1
LOC100505702
ENOPH1
PTPN13
SLC10A6
TIGD2
PDLIM5
PPA2
ARHGEF38
CASP6
LARP7
MYOZ2
EXOSC9
BBS7
CCRN4L
SMARCA5
ABCE1
TTC29
PET112
TIGD4
MAP9
C4orf45
RAPGEF2
LOC100506013
DDX60L
LOC100506122
PDCD6
KIAA0947
SRD5A1
2020-03-06
AMACR
NADKD1
FBXO4
NIM1
C5orf34
NNT
ERCC8
SREK1IP1
ADAMTS6
CENPH
CDK7
MCCC2
ANKRD31
ZCCHC9
RASA1
ELL2
LIX1
TSLP
APC
YTHDC2
FEM1C
AP3S1
ALDH7A1
2020-03-03
PRRC1
RAD50
GDF9
UQCRQ
HSPA4
TCF7
SMAD5-AS1
HNRNPA0
FAM13B
KDM3B
SLC4A9
SLC35A4
TMCO6
PCDHB7
FCHSD1
PCDH12
NR3C1
TIGD6
HMGXB3
CD74
RPS14
SMIM3
ATOX1
MED7
FNDC9
ADAM19
HMMR
RARS
KCNMB1
ERGIC1
SFXN1
NOP16
RNF44
RGS14
AGXT2L2
SNORD95
SERPINB1
MGC39372
TBC1D7
FAM8A1
SLC17A4
HIST1H3F
ZNF184
HIST1H2AJ
OR2H2
TRIM40
PPP1R18
MDC1
MICB
NFKBIL1
CSNK2B
ZBTB12
PPT2-EGFL8
PSMB8
HLA-DPB1
HSD17B8
CUTA
LINC00336
C6orf106
TAF11
STK38
MTCH1
FTSJD2
NFYA
PGC
C6orf132
PRPH2
C6orf226
CRIP3
YIPF3
SLC29A1
GLYATL3
PAQR8
GSTA5
GCLC
SMAP1
FILIP1
C6orf165
ANKRD6
MDN1
MAP3K7
CCNC
BVES-AS1
RTN4IP1
AMD1
TSPYL4
TSPYL1
FAM26F
FAM26E
NUS1
CEP85L
C6orf170
EPB41L2
HBS1L
NHEG1
EPM2A
ULBP2
ULBP3
CLDN20
SYTL3
PLG
PARK2
EIF2AK1
PHF14
SOSTDC1
LOC100506178
FAM126A
FAM221A
CYCS
HOTAIRM1
CREB5
DKFZP586I1420
KIAA0895
SFRP4
EPDR1
BLVRA
GBAS
ZNF117
SNORA22
TMEM248
DNAJC30
SNORA14A
LOC100133091
CROT
CLDN12
FZD1
FAM133B
SAMD9
PON2
ACN9
BRI3
ARPC1A
PDAP1
MCM7
PPP1R35
TRIM56
PLOD3
ARMC10
ORC5
PNPLA8
ST7-AS2
NAA38
AASS
IQUB
IRF5
CEP41
CHCHD3
MKRN1
AGK
WEE2
PRSS58
OR6W1P
GSTK1
EPHA1
LRRC61
FASTK
XRCC2
C7orf13
DNAJB6
MCPH1
TDH
BLK
DEFB135
PDGFRL
BIN3
TNFRSF10A
R3HCC1
ADAM28
HMBOX1
KIF13B
LOC100128750
TTI2
RNF122
WHSC1L1
C8orf4
IKBKB
CHRNB3
THAP1
PRKDC
RB1CC1
MRPL15
IMPAD1
YTHDF3
BHLHE22
ARMC1
VCPIP1
SNHG6
CSPP1
TRAM1
TMEM70
E2F5
CA13
NBN
DECR1
RAD54B
FBXO43
NACAP1
TAF2
DSCC1
ZHX2
FAM83A-AS1
FER1L6-AS1
FAM49B
GRINA
EXOSC4
ZNF34
C9orf66
SLC1A1
PPAPDC2
CDC37L1
PSIP1
RRAGA
RPS6
IFNA16
KLHL9
IFNA2
CDKN2B
IFT74
NDUFB6
KIAA1161
SIGMAR1
FANCG
STOML2
FAM214B
GBA2
CLTA
ZCCHC7
ANXA1
PCSK5
GCNT1
ISCA1
AUH
ZNF484
NINJ1
ZNF169
FANCC
HSD17B3
AAED1
ZNF510
XPA
NANS
FKTN
TMEM38B
PRPF4
WDR31
TNFSF15
FBXW2
OR1N1
MAPKAP1
RPL12
TTC16
C9orf16
TRUB2
ZER1
CRAT
POMT1
MED22
REXO4
WDR5
TUBB4B
NELFB
ACE2
ZRSR2
SYAP1
PPEF1
CXorf38
GPR34
NDP
HSD17B10
MAGEH1
ZXDB
FLJ44635
RPS4X
TSIX
ABCB7
APOOL
ARMCX3
RAB40A
PIH1D3
RGAG1
TDGF1P3
TRPC5OS
PLS3
NKAP
NKAPP1
ZNF280C
FAM122C
VGLL1
RBMX
SNORA36A
CMC4
MTCP1
WDTC1
NFYC
MUTYH
TTC22
CLCA4
AMPD2
RPRD2
SPRR2G
CD244
SNORD77
RNASEL
DDX59
FAM149B1
SNORD97
FNBP4
PLA2G16
NUDT22
NXPE2
HYLS1
CDK17
C12orf73
LRRC43
KIAA0226L
TDRD3
ZNF410
IFT43
SNORA11B
MIR376A1
C15orf62
LYRM1
CD19
ZNF624
EME1
FAM210A
SLC14A2
C19orf60
CD22
CPT1C
ZNF808
PEG3-AS1
ZNF544
MGC2752
PPP1R1C
PASK
KIF16B
ZNF133
SNORD12C
RUNX1
ZNF74
SYCE3
TMPRSS7
MYNN
EIF4G1
LMLN
CLDN22
TMEM174
GNPDA1
SPRY4
LOC728554
SCARNA27
PHACTR1
LOC153910
ABCB5
NPSR1-AS1
ZNF655
RAB19
RBM33
LINC00032
SNORA84
RC3H2
ZBTB43
RAB9A
AP1S2
XIAP
LURAP1
GPSM2
OAZ3
USP21
PRRC2C
RPS6KC1
RAB3GAP2
SNORA36B
C10orf67
ZNF487P
LIPK
FLJ37201
PDCD4-AS1
FAM204A
OR51G1
OR51A4
OR51V1
ARFIP2
RCN1
OR4C16
OR6Q1
TRPT1
VPS11
KLRB1
DAZAP2
SLC39A5
LLPH
USP30
OR4M1
OR10G2
PSMC6
SEL1L
MIR211
LOC91450
AGPHD1
C15orf40
PKD1L3
BANP
OR1A1
MINK1
MYO19
PHOSPHO1
FDXR
PRPSAP1
VAV1
OR7C1
GRAMD1A
PAFAH1B3
DQX1
RNU4ATAC
LOC100129961
SEL1L2
LINC00261
LOC339568
KRTAP19-5
KRTAP22-1
C21orf62
LINC00111
LOC391322
LRP5L
GTSE1
MIRLET7G
MIR15B
ZBBX
NCEH1
KNG1
LINC00887
MIR218-1
MTHFD2L
ANP32C
GRAMD3
OR2V2
OR14J1
PSORS1C3
RUNX2
DEFB114
DEFB113
REPS1
GNAT3
STRIP2
MKLN1
CNOT4
NDUFB2-AS1
TAS2R40
MIR153-2
SMIM19
MOS
SLC10A5
OR13D1
GARNL3
URM1
CACFD1
VSIG1
ALG13
IDS
MIR3675
PGCP1
PDE4DIP
LOC730159
MIR1278
LMOD1
MIR4677
LOC100499489
C10orf71
ANAPC16
MIR4483
MIR4681
MIR3973
MIR611
NOP2
LOC100129361
MIR613
LOC100507250
MIR4699
USP30-AS1
APEX1
GPR33
GMFB
NDUFAF4P1
CORO2B
MIR548H4
EFTUD1P1
ATP6V0C
ZNF48
MIR3676
MIR1288
MIR4523
GRB7
MIR2117
ZNF878
STX10
MIR642B
MIR4757
NLRC4
MIR548AD
RNF103
LOC285084
LOC100130452
MIR3130-1
LOC100507443
CTDSP1
SDCBP2
TGIF2
CTNNBL1
TSHZ2
MTRNR2L3
MIR3199-1
AP1B1P1
MIR4762
LUST
MIR548G
MIR548A3
IFT80
MIR4802
TNIP3
MIR4804
MIR3142
MIR548A1
LOC100131289
MUC22
MIR4646
C6orf10
CGA
MIR548B
CAHM
PMS2P3
MIR548M
MIR591
ACTR3C
MIR598
LOC286114
MIR3622A
C8orf59
MIR4661
MIR1206
MIR1207
MIR4473
VPS13A-AS1
MIR3153
MIR3910-1
DNM1
MIR500A
MIR421
CLDN2
MIR363
MIR514B
SEC22B
MIR1295B
RPS3
WNK1
MIR5692B
PCCA-AS1
MYO16-AS1
MIR5580
PROX2
PRC1-AS1
ZNF689
MAGOH2
MIR4524B
ARMC9
SGOL1-AS1
SNRK-AS1
OPA1-AS1
RPS16P5
ZNF138
MAGI2-AS2
MIR5681B
LINC00534
LOC100093698
